# Supplementary material
Source: publisher figshare collection journal article supplement (https://acs.figshare.com/ndownloader/files/4467259)
Supplement: Supplementary file 1 [file 4467259]

# Supporting Information

For

Bismuth Allyloxides

*Christina Knispel, Christian Limberg\* and Burkhard Ziemer*

Humboldt-Universität zu Berlin, Institut für Chemie, Brook-Taylor-Str. 2, D-12489 Berlin, Germany

|                                                                                            |    |
|--------------------------------------------------------------------------------------------|----|
| Experimental details for the syntheses of the used sodium salts.....                       | S2 |
| Results of the structure refinement of <b>2</b> .....                                      | S3 |
| Variable temperature NMR spectra recorded in toluene- $d_8$ of <b>2</b> and <b>3</b> ..... | S4 |

## Experimental Details for the Syntheses of the Used Sodium Salts

All manipulations were carried out in a glove-box, or else by means of Schlenk-type techniques involving the use of dry and oxygen-free argon atmosphere.

**[Na(OCH(CH<sub>3</sub>)CH=CH<sub>2</sub>)]**. At 0 °C 4.5 mL 3-butene-2-ol (3.74 g, 52 mmol) were added to a stirred suspension of NaH (1.51 g, 63 mmol) in 50 mL thf. After addition of the first drop a heavy gas evolution could be observed. After 10 minutes the ice-bath was removed and the reaction mixture was allowed to warm up to ambient temperature. After stirring the suspension for 3 h at ambient temperature, the colorless solution was filtered off of unconverted NaH. Removal of all volatile components and drying in vacuum yielded [Na(OCH(CH<sub>3</sub>)CH=CH<sub>2</sub>)] (4.11 g, 44 mmol, 84 %) in form of a white microcrystalline solid. <sup>1</sup>H NMR (C<sub>6</sub>D<sub>6</sub>): δ = 6.06 (m, 1H, CH=CH<sub>2</sub>), 5.19 (dd, 1H, CH<sub>2</sub>), 4.95 (dd, 1H, CH<sub>2</sub>), 4.45 (m, 1H, CH(CH<sub>3</sub>)), 1.32 (d, 3H, CH<sub>3</sub>); <sup>1</sup>H NMR (CD<sub>3</sub>CN): δ = 5.92 (m, 1H, CH=CH<sub>2</sub>), 4.96 (dd, 1H, CH<sub>2</sub>), 4.67 (dd, 1H, CH<sub>2</sub>), 4.23 (m, 1H, CH(CH<sub>3</sub>)), 1.00 (d, 3H, CH<sub>3</sub>). <sup>13</sup>C{<sup>1</sup>H} NMR (C<sub>6</sub>D<sub>6</sub>): δ = 150.6 (CH=CH<sub>2</sub>), 110.6 (CH<sub>2</sub>), 70.6 (CH(CH<sub>3</sub>)), 28.5 (CH<sub>3</sub>); <sup>13</sup>C{<sup>1</sup>H} NMR (CD<sub>3</sub>CN): δ = 153.9 (CH=CH<sub>2</sub>), 107.8 (CH<sub>2</sub>), 71.7 (CH(CH<sub>3</sub>)), 29.5 (CH<sub>3</sub>).

**[Na(OC(CH<sub>3</sub>)<sub>2</sub>CH=CH<sub>2</sub>)]**. At 0 °C 4.2 mL 2-methyl-3-butene-2-ol (3.4 g, 40 mmol) were added to a stirred suspension of NaH (1.0 g, 42 mmol) in 80 mL thf. After addition of the first drop a heavy gas evolution could be observed. After 10 minutes the ice-bath was removed and the reaction mixture was allowed to warm up to ambient temperature. After stirring the suspension for 3 h at ambient temperature, the colorless solution was filtered off of excess NaH. Removal of all volatile components and drying in vacuum yielded [Na(OC(CH<sub>3</sub>)<sub>2</sub>CH=CH<sub>2</sub>)] (3.66 g, 34 mmol, 85 %) in form of a white beige microcrystalline solid. <sup>1</sup>H NMR (C<sub>6</sub>D<sub>6</sub>): δ = 6.22 (q, 1H, CH), 5.14 (dd, 1H, CH<sub>2</sub>), 4.82 (dd, 1H, CH<sub>2</sub>), 1.24 (d, 6H, CH<sub>3</sub>). <sup>13</sup>C{<sup>1</sup>H} NMR (C<sub>6</sub>D<sub>6</sub>): δ = 155.7 (CH), 106.5 (CH<sub>2</sub>), 68.7 (C), 34.5 (CH<sub>3</sub>). IR (KBr): ν [cm<sup>-1</sup>] = 3077, 2959, 2919, 2853, 1636, 1465, 1411, 1366, 1351, 1238, 1171, 1158, 1039, 1007, 978, 962, 915, 888, 694, 541, 506, 469, 430. Anal. Calcd for C<sub>5</sub>H<sub>9</sub>ONa (M = 108.11 gmol<sup>-1</sup>): C 55.55, H 8.39 %. Found: C 55.18, H 8.39.

## Results of the Structure Refinement of 2

Evaporation of the solvent from a saturated solution of [Bi(OCH(CH<sub>3</sub>)CH=CH<sub>2</sub>)<sub>3</sub>], **2** in toluene led to colorless crystals that were suitable for an X-ray diffraction analyses. The crystal data were collected on a Stoe IPDS 2T diffractometer using MoK $\alpha$  radiation,  $\lambda = 0.71073 \text{ \AA}$ . Relevant crystallographic data are collected in the Table S1.

**Table S1.** Crystal data and experimental parameters for the crystal structure analyses of **2**.

| <b>2</b>                                                                |                                               |
|-------------------------------------------------------------------------|-----------------------------------------------|
| Formula                                                                 | C <sub>3</sub> Bi <sub>2</sub> O <sub>5</sub> |
| temp, K                                                                 | 100(2)                                        |
| crystal system                                                          | monoclinic                                    |
| space group                                                             | P 1 1 2 <sub>1</sub> /a                       |
| a, $\text{\AA}$                                                         | 21.122(3)                                     |
| b, $\text{\AA}$                                                         | 21.122(3)                                     |
| c, $\text{\AA}$                                                         | 7.3630(10)                                    |
| $\alpha$ , deg                                                          | 90                                            |
| $\beta$ , deg                                                           | 90                                            |
| $\gamma$ , deg                                                          | 120                                           |
| V, $\text{\AA}^3$                                                       | 2844.3(7)                                     |
| density, g cm <sup>-3</sup>                                             | 1.972                                         |
| $\mu(\text{MoK}\alpha)$ , mm <sup>-1</sup>                              | 12.390                                        |
| $F(000)$                                                                | 1600                                          |
| GoF                                                                     | 1.034                                         |
| R <sub>1</sub> [ $I > 2\sigma(I)$ ]                                     | 0.0791                                        |
| wR <sub>2</sub> [all data]                                              | 0.2200                                        |
| $\Delta\rho_{\text{min}}/\Delta\rho_{\text{max}}$ , e $\text{\AA}^{-3}$ | 4.449/ -1.778                                 |

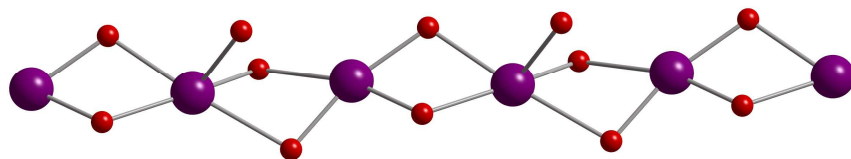

**Figure S1.** Incomplete molecular structure of **2** showing the identified bismuth and oxygen atom

positions. (Determined carbon atoms of the allyloxide residues were omitted.)

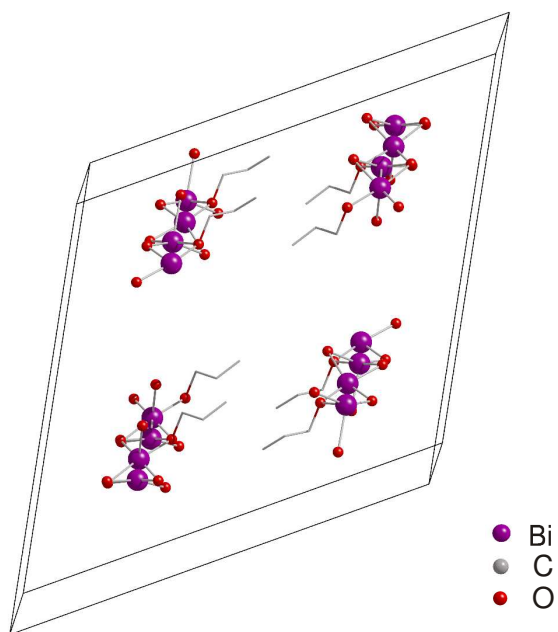

**Figure S2.** View showing the isolated chains of **2** along the *c* axes.

### Variable Temperature NMR Spectra Recorded in Toluene-*d*<sub>8</sub>

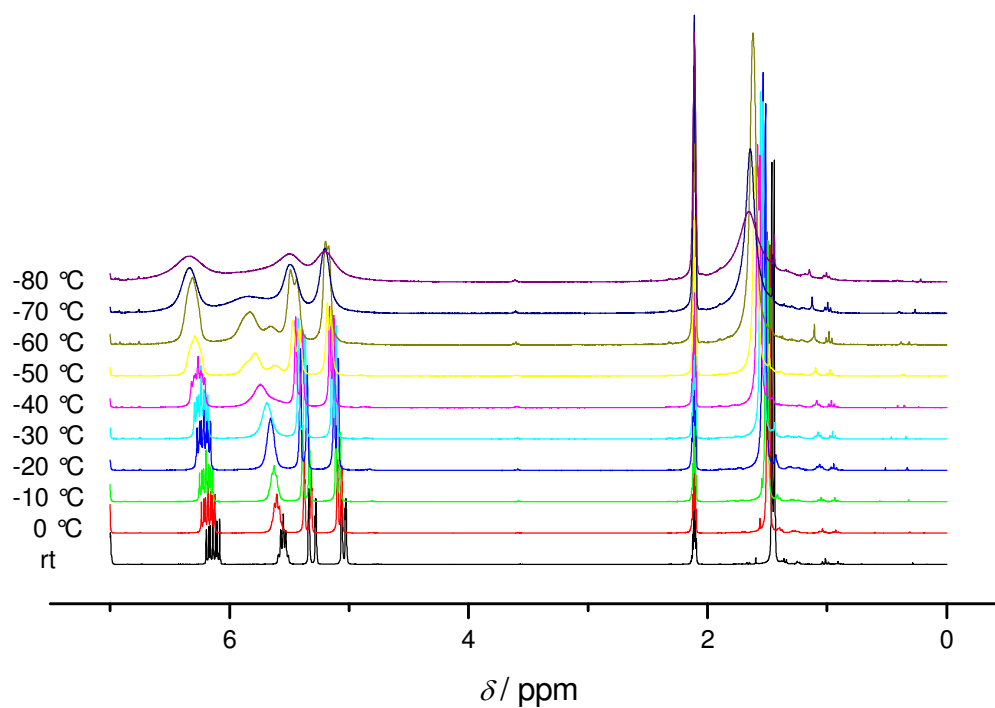

**Figure S3.** Variable temperature NMR spectra of  $[\text{Bi}(\text{OCH}(\text{CH}_3)\text{CH}=\text{CH}_2)_3]$ , **2**, in toluene- $d_8$ .

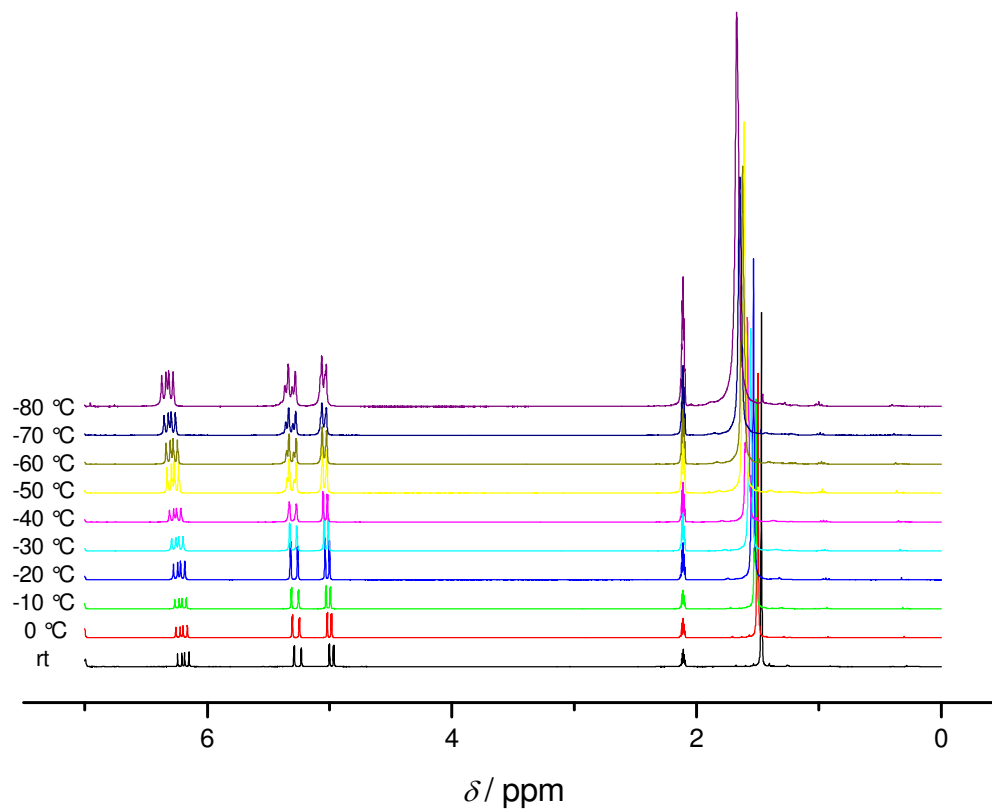

**Figure S4.** Variable temperature NMR spectra of [Bi(OC(CH<sub>3</sub>)<sub>2</sub>CH=CH<sub>2</sub>)<sub>3</sub>], **3**, in toluene-*d*<sub>8</sub>.
